# Supplementary material
Source: PubMed Central journal article supplement (PMC3023554)
Supplement: supp_M012153_jlr.M012153-1.pdf [file supp_M012153_jlr.M012153-1.pdf]

## Supplementary Material

**Fig. S1.** Selectivity of PF-3845 in peripheral tissues. (**A–L**) Serine hydrolase activity profiles using the active site-directed probe FP-Rh from liver (**A**), kidney (**B**), white adipose tissue (WAT) (**C**), heart (**D**), lung (**E**), or brown adipose tissue (BAT) (**F**) membranes prepared from mice as described in the experimental procedures. Two representative gels are shown for each tissue, with (*right panels*) or without (*left panels*) PNGaseF treatment.
